# Supplementary material for: Mother’s Partnership Status and Allomothering Networks in the United Kingdom and United States
Source: MDPI journal article supplement (doi:10.3390/socsci10050182), 2021-05-20
Supplement: s1 [file s1]

## Supplementary Materials

Table S1. Models specified for each portion of the analysis

|                                                                                                                                                                                                                                                                                                                                                                                                                  |
|------------------------------------------------------------------------------------------------------------------------------------------------------------------------------------------------------------------------------------------------------------------------------------------------------------------------------------------------------------------------------------------------------------------|
| <b>Part 1: Partner help</b>                                                                                                                                                                                                                                                                                                                                                                                      |
| help_partner ~ partnerstatus + kin_prox + age + relig + education + nativity + ethnicity + hhquintile + ressize<br>alloQ_partner ~ partnerstatus + kin_prox + age + relig + education + nativity + ethnicity + hhquintile + ressize<br>help_partner ~ fathertype + kin_prox + age + relig + education + nativity + ethnicity + hhquintile + ressize                                                              |
| <b>Part 1: Partner help, additional models presented in the supplementary materials only</b>                                                                                                                                                                                                                                                                                                                     |
| superQ_partner ~ partnerstatus + kin_prox + age + relig + education + nativity + ethnicity + hhquintile + ressize<br>alloD_partner ~ partnerstatus + kin_prox + age + relig + education + nativity + ethnicity + hhquintile + ressize                                                                                                                                                                            |
| <b>Part 2: Childcare help from maternal kin</b>                                                                                                                                                                                                                                                                                                                                                                  |
| help_mat_kin ~ partnerstatus + alloQ_partner + kin_prox_mat + age + relig + education + nativity + ethnicity + hhquintile + ressize<br>alloQ_mat_kin ~ partnerstatus + alloQ_partner + kin_prox_mat + age + relig + education + nativity + ethnicity + hhquintile + ressize<br>alloQ_matp ~ partnerstatus + alloQ_partner + kin_prox_mat + age + relig + education + nativity + ethnicity + hhquintile + ressize |
| <b>Part 3: Childcare help from other allomothers</b>                                                                                                                                                                                                                                                                                                                                                             |
| help_other ~ partnerstatus + alloQ_partner + kin_prox_mat + age + relig + education + nativity + ethnicity + hhquintile + ressize<br>alloQ_other ~ partnerstatus + alloQ_partner + kin_prox_mat + age + relig + education + nativity + ethnicity + hhquintile + ressize<br>alloQ_other_p ~ partnerstatus + alloQ_partner + kin_prox_mat + age + relig + education + nativity + ethnicity + hhquintile + ressize  |

**Part 4: Fertility**

births\_adj ~ partnerstatus + relig + education + nativity + ethnicity + hhquintile + ressize

births\_progress ~ partnerstatus + births\_num + age + relig + education + nativity + ethnicity + hhquintile + ressize

births\_intent ~ births\_num + age partnerstatus + relig + education + nativity + ethnicity + hhquintile +

**Part 4: Fertility predicted by allomothering**

births\_adj ~ partnerstatus + help\_all + relig + education + nativity + ethnicity + hhquintile + ressize

births\_adj ~ partnerstatus + alloQ + relig + education + nativity + ethnicity + hhquintile + ressize

Note: Each model was built twice, for each of the countries separately (UK and US)

Table S2. Variable dictionary

| <b>Outcomes</b>        |                                                                                                                                                                                                                                                                                                                                                                                    |
|------------------------|------------------------------------------------------------------------------------------------------------------------------------------------------------------------------------------------------------------------------------------------------------------------------------------------------------------------------------------------------------------------------------|
| <b>births_adj</b>      | Age-adjusted number of births, as the residual of a linear regression of number of births on age                                                                                                                                                                                                                                                                                   |
| <b>births_progress</b> | Binary variable indicating whether the mother intends to have another child in the next two years (1) or not (0)                                                                                                                                                                                                                                                                   |
| <b>births_intent</b>   | Number of children the mother would like to have, calculated as number of births plus how many more she would like to have                                                                                                                                                                                                                                                         |
| <b>help_partner</b>    | Binary variable indicating whether the mother's partner contributes with childcare (1) or not (0)                                                                                                                                                                                                                                                                                  |
| <b>alloQ_partner</b>   | Childcare help score for the mother's partner: calculated as a frequency of five childcare tasks (washing/changing, playing, feeding, supervising, other) converted to a number of occurrences over a month (daily = 30, weekly = 8, monthly = 2, less than monthly or never = 0) and summed across types of care.                                                                 |
| <b>superQ_partner</b>  | Alternative childcare measure for the mother's partner: calculated as a frequency of a single childcare tasks (supervising the child) converted to a number of occurrences over a month (daily = 30, weekly = 8, monthly = 2, less than monthly or never = 0).                                                                                                                     |
| <b>alloD_partner</b>   | Alternative childcare measure for the mother's partner: calculates as the number of childcare tasks (washing/changing, playing, feeding, supervising, other) that were performed daily.                                                                                                                                                                                            |
| <b>help_mat_kin</b>    | Number of maternal kin providing at least one type of childcare help at any frequency                                                                                                                                                                                                                                                                                              |
| <b>alloQ_mat_kin</b>   | Childcare help score for the child's maternal kin: calculated as a frequency of five childcare tasks (washing/changing, playing, feeding, supervising, other) converted to a number of occurrences over a month (daily = 30, weekly = 8, monthly = 2, less than monthly or never = 0) and summed across types of care, and then summed across maternal kin helpers                 |
| <b>alloQ_matp</b>      | Percentage of the overall childcare score that is contributed by maternal kin                                                                                                                                                                                                                                                                                                      |
| <b>help_other</b>      | Number of people providing at least one type of childcare help at any frequency, who are neither the partner nor maternal kin                                                                                                                                                                                                                                                      |
| <b>alloQ_other</b>     | Childcare help score for other helpers (not the partner and not maternal kin): calculated as a frequency of five childcare tasks (washing/changing, playing, feeding, supervising, other) converted to a number of occurrences over a month (daily = 30, weekly = 8, monthly = 2, less than monthly or never = 0) and summed across types of care, and then summed across helpers. |
| <b>alloQ_other_p</b>   | Percentage of the overall childcare score that is contributed by helpers that are neither the partner nor maternal kin                                                                                                                                                                                                                                                             |

|                        |                                                                                                                                                                                                                                                                                                                                               |
|------------------------|-----------------------------------------------------------------------------------------------------------------------------------------------------------------------------------------------------------------------------------------------------------------------------------------------------------------------------------------------|
| <b>help_all</b>        |                                                                                                                                                                                                                                                                                                                                               |
| <b>alloQ_all</b>       |                                                                                                                                                                                                                                                                                                                                               |
| <b>Main predictors</b> |                                                                                                                                                                                                                                                                                                                                               |
| <b>partnerstatus</b>   | The woman's partnership status, categorical variable with levels "Partnered" (baseline); "Unpartnered" or "Repartnered"                                                                                                                                                                                                                       |
| <b>fathertype</b>      | The relationship of the mother's partner to the focal child with levels "Partnered dad" (baseline); "Repartnered dad"; "Step dad"                                                                                                                                                                                                             |
| <b>help_all</b>        | Number of allomothers providing at least one type of childcare help at any frequency                                                                                                                                                                                                                                                          |
| <b>alloQ_all</b>       | Childcare help score for all helpers: calculated as a frequency of five childcare tasks (washing/changing, playing, feeding, supervising, other) converted to a number of occurrences over a month (daily = 30, weekly = 8, monthly = 2, less than monthly or never = 0) and summed across types of care, and then summed across all helpers. |
| <b>Covariates</b>      |                                                                                                                                                                                                                                                                                                                                               |
| <b>age</b>             | Mother's age                                                                                                                                                                                                                                                                                                                                  |
| <b>relig</b>           | Whether or not the mother states a religious affiliation                                                                                                                                                                                                                                                                                      |
| <b>education</b>       | The mother's highest attained level of education, coded as primary (1), secondary (2), pre-tertiary (3), tertiary (4) or post-tertiary (5).                                                                                                                                                                                                   |
| <b>nativity</b>        | Binary variable indicating whether the mother was born in the country in which she currently resides (1) or not (1)                                                                                                                                                                                                                           |
| <b>ethnicity</b>       | Binary variable indicating whether the mother self-identified as white (0) or non-white (1)                                                                                                                                                                                                                                                   |
| <b>hhquintile</b>      | Household quintile, coded as the household income matched to the respective country's mean income for each quintile in 2018 (US Census Bureau 2019; Office for National Statistics 2019).                                                                                                                                                     |
| <b>ressize</b>         | Size of the place where the mother resides, coded as village (1), town (2), or urban center (3)                                                                                                                                                                                                                                               |
| <b>kin_prox</b>        | Number of kin residing within one hour's travel time from the mother's residence                                                                                                                                                                                                                                                              |
| <b>kin_prox_mat</b>    | Number of maternal kin residing within one hour's travel time from the mother's residence                                                                                                                                                                                                                                                     |
| <b>child_age</b>       | Age of the focal child                                                                                                                                                                                                                                                                                                                        |
| <b>child_paidcare</b>  | Number of hours that the focal child spends in paid care weekly                                                                                                                                                                                                                                                                               |
| <b>kids_inhome</b>     | Total number of children (biological and otherwise) residing in the mother's home                                                                                                                                                                                                                                                             |

**Table S3. Results of Bayesian regression models predicting partner involvement level using alternative measures of level of involvement – Number of tasks performed at least daily**

| <i>Predictors</i>                  | UK                           |                 | US                           |                 |
|------------------------------------|------------------------------|-----------------|------------------------------|-----------------|
|                                    | <i>Incidence Rate Ratios</i> | <i>CI (95%)</i> | <i>Incidence Rate Ratios</i> | <i>CI (95%)</i> |
| Intercept                          | 3.36                         | 2.38 – 4.69     | 1.42                         | 0.85 – 2.33     |
| Partner status: Repartnered        | 0.88                         | 0.76 – 1.03     | 1.05                         | 0.89 – 1.22     |
| Age                                | 1.00                         | 0.99 – 1.01     | 1.02                         | 1.01 – 1.03     |
| Mother is religiously affiliated   | 0.96                         | 0.89 – 1.03     | 0.92                         | 0.83 – 1.03     |
| Number of kin residing nearby      | 0.99                         | 0.98 – 1.01     | 1.01                         | 1.00 – 1.03     |
| Age of focal child                 | 0.96                         | 0.93 – 1.00     | 0.94                         | 0.91 – 0.98     |
| Number of hours spent in paid care | 1.00                         | 1.00 – 1.01     | 1.00                         | 1.00 – 1.01     |
| Total number of kids in home       | 0.99                         | 0.94 – 1.04     | 0.97                         | 0.92 – 1.04     |
| Educational achievement            | 1.06                         | 1.01 – 1.11     | 1.06                         | 1.00 – 1.12     |
| Nativity                           | 1.12                         | 0.99 – 1.27     | 1.13                         | 0.90 – 1.44     |
| Ethnicity                          | 0.95                         | 0.84 – 1.08     | 0.94                         | 0.83 – 1.06     |
| Household income quintile          | 0.97                         | 0.93 – 1.02     | 0.99                         | 0.94 – 1.05     |
| Size of place of residence         | 0.98                         | 0.93 – 1.03     | 1.03                         | 0.95 – 1.12     |
| Observations                       | 836                          |                 | 528                          |                 |

**Figure S1 – Visualization of Bayesian regression models predicting partner involvement level using alternative measures of level of involvement – Number of tasks performed at least daily – see also Table S3**

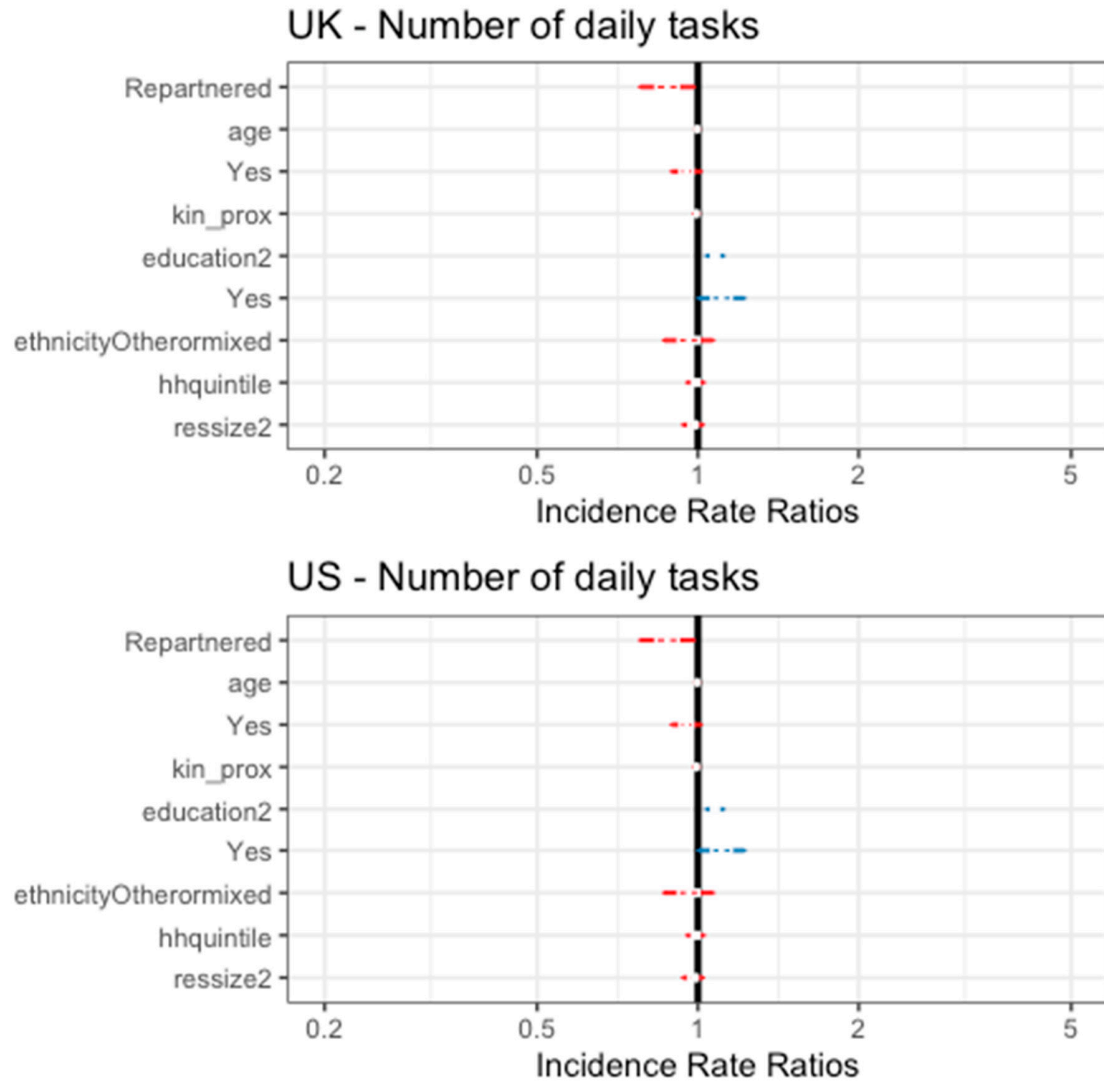

**Table S4. Results of Bayesian regression models predicting partner involvement level using alternative measures of level of involvement – Number of days of supervision provided over the course of a month**

| <i>Predictors</i>                  | UK                           |                 | US                           |                 |
|------------------------------------|------------------------------|-----------------|------------------------------|-----------------|
|                                    | <i>Incidence Rate Ratios</i> | <i>CI (95%)</i> | <i>Incidence Rate Ratios</i> | <i>CI (95%)</i> |
| Intercept                          | 20.74                        | 18.07 – 23.69   | 10.95                        | 9.03 – 13.28    |
| Partner status: Repartnered        | 0.89                         | 0.84 – 0.95     | 1.00                         | 0.94 – 1.06     |
| Age                                | 1.00                         | 1.00 – 1.00     | 1.02                         | 1.01 – 1.02     |
| Mother is religiously affiliated   | 0.96                         | 0.93 – 0.99     | 0.96                         | 0.92 – 1.00     |
| Number of kin residing nearby      | 0.99                         | 0.99 – 1.00     | 1.01                         | 1.01 – 1.02     |
| Age of focal child                 | 0.98                         | 0.96 – 0.99     | 0.96                         | 0.95 – 0.98     |
| Number of hours spent in paid care | 1.00                         | 1.00 – 1.00     | 1.00                         | 1.00 – 1.01     |
| Total number of kids in home       | 0.99                         | 0.97 – 1.01     | 1.00                         | 0.98 – 1.02     |
| Educational achievement            | 1.07                         | 1.06 – 1.09     | 1.03                         | 1.01 – 1.06     |
| Nativity                           | 1.14                         | 1.09 – 1.19     | 1.02                         | 0.93 – 1.11     |
| Ethnicity                          | 0.97                         | 0.92 – 1.02     | 0.92                         | 0.88 – 0.97     |
| Household income quintile          | 0.96                         | 0.95 – 0.98     | 0.98                         | 0.96 – 1.00     |
| Size of place of residence         | 0.98                         | 0.96 – 1.00     | 1.03                         | 1.00 – 1.06     |
| Observations                       | 836                          |                 | 528                          |                 |

**Figure S2. Visualization of Bayesian regression models predicting partner involvement level using alternative measures of level of involvement – Number of days of supervision provided over the course of a month**

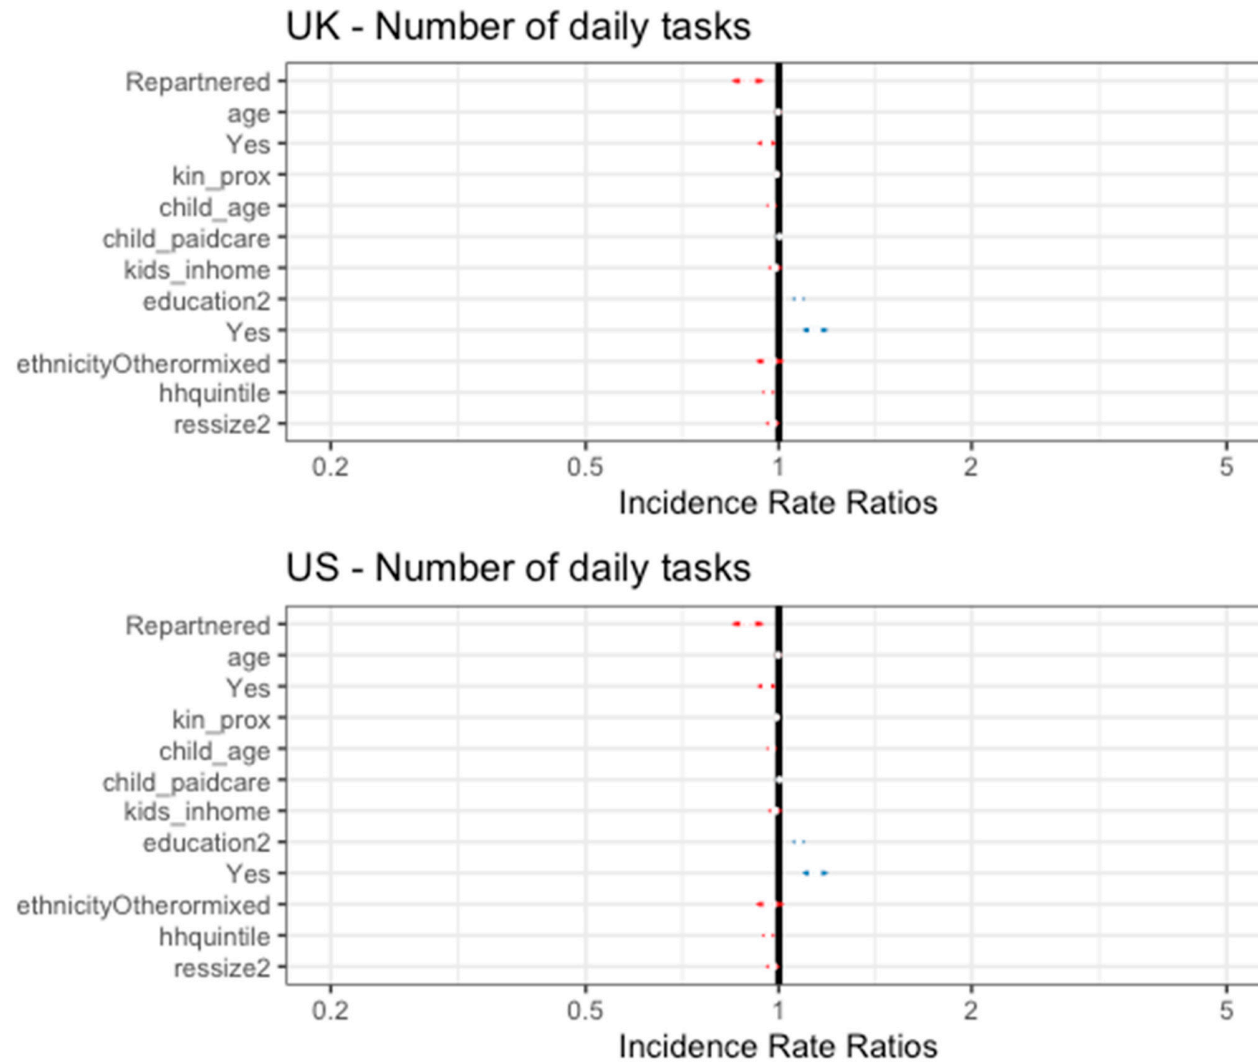



**Table S5. Results of Bayesian regression models predicting number of maternal kin allomothers – alternative model not without kin proximity or level of partner help covariates**

| <i>Predictors</i>             | UK                           |                 | US                           |                 |
|-------------------------------|------------------------------|-----------------|------------------------------|-----------------|
|                               | <i>Incidence Rate Ratios</i> | <i>CI (95%)</i> | <i>Incidence Rate Ratios</i> | <i>CI (95%)</i> |
| Intercept                     | 0.78                         | 0.46 – 1.33     | 0.36                         | 0.16 – 0.80     |
| partnerstatus:<br>Unpartnered | 0.27                         | 0.17 – 0.39     | 0.31                         | 0.20 – 0.45     |
| partnerstatus:<br>Repartnered | 0.94                         | 0.73 – 1.19     | 1.06                         | 0.83 – 1.36     |
| age                           | 1.01                         | 1.00 – 1.02     | 1.03                         | 1.01 – 1.05     |
| relig: Yes                    | 1.06                         | 0.94 – 1.21     | 0.95                         | 0.80 – 1.13     |
| child_age                     | 0.97                         | 0.92 – 1.04     | 0.97                         | 0.91 – 1.04     |
| child_paidcare                | 1.00                         | 1.00 – 1.01     | 1.00                         | 1.00 – 1.01     |
| kids_inhome                   | 0.96                         | 0.88 – 1.05     | 1.09                         | 0.99 – 1.19     |
| education2                    | 1.04                         | 0.96 – 1.12     | 0.96                         | 0.88 – 1.05     |
| nativity: Yes                 | 1.21                         | 1.00 – 1.48     | 1.14                         | 0.79 – 1.73     |
| ethnicityOtherormixed         | 0.87                         | 0.70 – 1.07     | 0.94                         | 0.78 – 1.14     |
| hhquintile                    | 1.01                         | 0.94 – 1.08     | 0.99                         | 0.91 – 1.08     |
| ressize2                      | 0.94                         | 0.86 – 1.03     | 1.08                         | 0.94 – 1.23     |
| Observations                  | 919                          |                 | 606                          |                 |

**Table S6. Results of Bayesian regression models predicting level of investment of maternal kin allomothers – alternative model not without kin proximity or level of partner help covariates**

| <i>Predictors</i>             | UK                           |                 | US                           |                 |
|-------------------------------|------------------------------|-----------------|------------------------------|-----------------|
|                               | <i>Incidence Rate Ratios</i> | <i>CI (95%)</i> | <i>Incidence Rate Ratios</i> | <i>CI (95%)</i> |
| Intercept                     | 56.30                        | 49.55 – 63.87   | 13.59                        | 11.47 – 15.97   |
| partnerstatus:<br>Unpartnered | 2.17                         | 2.08 – 2.27     | 3.32                         | 3.17 – 3.47     |
| partnerstatus:<br>Repartnered | 1.01                         | 0.95 – 1.07     | 0.88                         | 0.81 – 0.95     |
| age                           | 0.93                         | 0.93 – 0.93     | 0.98                         | 0.98 – 0.99     |
| relig: Yes                    | 1.10                         | 1.07 – 1.14     | 0.79                         | 0.76 – 0.82     |
| child_age                     | 1.10                         | 1.08 – 1.11     | 1.03                         | 1.01 – 1.05     |
| child_paidcare                | 0.98                         | 0.98 – 0.98     | 1.01                         | 1.01 – 1.01     |
| kids_inhome                   | 0.81                         | 0.79 – 0.83     | 1.01                         | 0.98 – 1.03     |
| education2                    | 1.18                         | 1.16 – 1.20     | 1.13                         | 1.10 – 1.15     |
| nativity: Yes                 | 2.08                         | 1.97 – 2.21     | 0.47                         | 0.44 – 0.50     |
| ethnicityOtherormixed         | 0.75                         | 0.72 – 0.79     | 1.29                         | 1.24 – 1.34     |
| hhquintile                    | 1.11                         | 1.09 – 1.13     | 1.03                         | 1.01 – 1.05     |
| ressize2                      | 0.96                         | 0.94 – 0.98     | 1.30                         | 1.25 – 1.34     |
| Observations                  | 919                          |                 | 606                          |                 |

**Table S7. Results of Bayesian regression models predicting percentage of overall help provided by maternal kin allomothers – alternative model not without kin proximity or level of partner help covariates**

| <i>Predictors</i>             | UK               |                 | US               |                 |
|-------------------------------|------------------|-----------------|------------------|-----------------|
|                               | <i>Estimates</i> | <i>CI (95%)</i> | <i>Estimates</i> | <i>CI (95%)</i> |
| Intercept                     | 0.27             | 0.13 – 0.40     | 0.26             | 0.05 – 0.47     |
| partnerstatus:<br>Unpartnered | 0.44             | 0.37 – 0.51     | 0.48             | 0.40 – 0.55     |
| partnerstatus:<br>Repartnered | 0.01             | -0.05 – 0.08    | -0.01            | -0.09 – 0.06    |
| age                           | -0.01            | -0.01 – -0.00   | -0.00            | -0.01 – 0.00    |
| relig: Yes                    | 0.02             | -0.02 – 0.05    | -0.02            | -0.07 – 0.03    |
| child_age                     | 0.00             | -0.01 – 0.02    | 0.01             | -0.01 – 0.03    |
| child_paidcare                | -0.00            | -0.00 – 0.00    | 0.00             | -0.00 – 0.00    |
| kids_inhome                   | -0.02            | -0.04 – 0.01    | -0.01            | -0.04 – 0.01    |
| education2                    | 0.01             | -0.01 – 0.03    | -0.00            | -0.03 – 0.02    |
| nativity: Yes                 | 0.10             | 0.05 – 0.15     | -0.09            | -0.20 – 0.00    |
| ethnicityOtherormixed         | -0.04            | -0.10 – 0.01    | 0.01             | -0.04 – 0.06    |
| hhquintile                    | 0.02             | -0.00 – 0.04    | 0.01             | -0.02 – 0.03    |
| ressize2                      | -0.00            | -0.03 – 0.02    | 0.01             | -0.03 – 0.05    |
| Observations                  | 809              |                 | 537              |                 |

**Table S8. Results of Bayesian regression models predicting number of other allomother caregivers – alternative model not without kin proximity or level of partner help covariates**

| <i>Predictors</i>             | UK                           |                 | US                           |                 |
|-------------------------------|------------------------------|-----------------|------------------------------|-----------------|
|                               | <i>Incidence Rate Ratios</i> | <i>CI (95%)</i> | <i>Incidence Rate Ratios</i> | <i>CI (95%)</i> |
| Intercept                     | 0.30                         | 0.13 – 0.68     | 0.05                         | 0.02 – 0.14     |
| partnerstatus:<br>Unpartnered | 1.10                         | 0.76 – 1.55     | 2.00                         | 1.44 – 2.74     |
| partnerstatus:<br>Repartnered | 1.08                         | 0.74 – 1.51     | 1.29                         | 0.88 – 1.85     |
| age                           | 1.03                         | 1.01 – 1.05     | 1.02                         | 0.99 – 1.04     |
| relig: Yes                    | 1.30                         | 1.09 – 1.57     | 0.94                         | 0.73 – 1.20     |
| child_age                     | 0.94                         | 0.86 – 1.03     | 0.99                         | 0.90 – 1.09     |
| child_paidcare                | 1.01                         | 1.00 – 1.02     | 1.01                         | 1.00 – 1.02     |
| kids_inhome                   | 0.89                         | 0.78 – 1.01     | 1.24                         | 1.09 – 1.41     |
| education2                    | 0.92                         | 0.83 – 1.03     | 1.00                         | 0.87 – 1.14     |
| nativity: Yes                 | 1.31                         | 0.98 – 1.80     | 1.38                         | 0.80 – 2.66     |
| ethnicityOtherormixed         | 0.75                         | 0.54 – 1.03     | 0.96                         | 0.74 – 1.26     |
| hhquintile                    | 1.01                         | 0.91 – 1.13     | 1.14                         | 1.01 – 1.29     |
| ressize2                      | 0.89                         | 0.78 – 1.01     | 1.26                         | 1.04 – 1.54     |
| Observations                  | 919                          |                 | 606                          |                 |

**Table S9. Results of Bayesian regression models predicting level of support from other allomother caregivers – alternative model not without kin proximity or level of partner help covariates**

| <i>Predictors</i>             | UK                           |                 | US                           |                 |
|-------------------------------|------------------------------|-----------------|------------------------------|-----------------|
|                               | <i>Incidence Rate Ratios</i> | <i>CI (95%)</i> | <i>Incidence Rate Ratios</i> | <i>CI (95%)</i> |
| Intercept                     | 4.40                         | 3.82 – 5.07     | 2.85                         | 2.43 – 3.34     |
| partnerstatus:<br>Unpartnered | 1.97                         | 1.85 – 2.11     | 2.72                         | 2.59 – 2.84     |
| partnerstatus:<br>Repartnered | 1.41                         | 1.33 – 1.50     | 1.78                         | 1.69 – 1.87     |
| alloQ_p                       | 1.00                         | 1.00 – 1.00     |                              |                 |
| age                           | 1.04                         | 1.04 – 1.04     | 0.99                         | 0.99 – 1.00     |
| relig: Yes                    | 1.51                         | 1.46 – 1.56     | 0.96                         | 0.93 – 0.99     |
| child_age                     | 0.86                         | 0.84 – 0.87     | 1.01                         | 0.99 – 1.02     |
| child_paidcare                | 1.01                         | 1.01 – 1.01     | 1.00                         | 1.00 – 1.01     |
| kids_inhome                   | 0.97                         | 0.95 – 0.99     | 1.39                         | 1.37 – 1.42     |
| education2                    | 0.93                         | 0.91 – 0.95     | 1.07                         | 1.05 – 1.09     |
| nativity: Yes                 | 1.58                         | 1.49 – 1.67     | 0.84                         | 0.78 – 0.90     |
| ethnicityOtherormixed         | 0.86                         | 0.81 – 0.91     | 0.90                         | 0.87 – 0.94     |
| hhquintile                    | 1.02                         | 1.00 – 1.04     | 1.14                         | 1.12 – 1.16     |
| ressize2                      | 0.92                         | 0.90 – 0.94     | 1.44                         | 1.40 – 1.48     |
| Observations                  | 919                          |                 | 606                          |                 |

**Table S10. Results of Bayesian regression models predicting percentage of overall help provided by other allomother caregivers – alternative model not without kin proximity or level of partner help covariates**

| <i>Predictors</i>             | UK               |                 | US               |                 |
|-------------------------------|------------------|-----------------|------------------|-----------------|
|                               | <i>Estimates</i> | <i>CI (95%)</i> | <i>Estimates</i> | <i>CI (95%)</i> |
| Intercept                     | 0.02             | -0.12 – 0.15    | -0.07            | -0.31 – 0.19    |
| partnerstatus:<br>Unpartnered | 0.33             | 0.27 – 0.40     | 0.30             | 0.21 – 0.39     |
| partnerstatus:<br>Repartnered | 0.03             | -0.03 – 0.10    | 0.07             | -0.02 – 0.16    |
| age                           | 0.00             | 0.00 – 0.01     | -0.00            | -0.01 – 0.00    |
| relig: Yes                    | 0.01             | -0.02 – 0.05    | 0.02             | -0.04 – 0.08    |
| child_age                     | -0.01            | -0.03 – 0.01    | 0.02             | 0.00 – 0.05     |
| child_paidcare                | 0.00             | -0.00 – 0.00    | -0.00            | -0.00 – 0.00    |
| kids_inhome                   | 0.01             | -0.01 – 0.04    | 0.03             | -0.00 – 0.06    |
| education2                    | -0.01            | -0.03 – 0.01    | 0.02             | -0.01 – 0.05    |
| nativity: Yes                 | -0.00            | -0.05 – 0.05    | 0.03             | -0.09 – 0.15    |
| ethnicityOtherormixed         | 0.01             | -0.04 – 0.07    | -0.00            | -0.06 – 0.06    |
| hhquintile                    | -0.00            | -0.02 – 0.02    | 0.02             | -0.00 – 0.05    |
| ressize2                      | -0.01            | -0.03 – 0.01    | 0.03             | -0.02 – 0.07    |
| Observations                  | 809              |                 | 537              |                 |

**Table S10. Results of Bayesian regression models predicting hours weekly of paid childcare – alternative model not without kin proximity or level of partner help covariates**

| <i>Predictors</i>             | UK               |                 | US               |                 |
|-------------------------------|------------------|-----------------|------------------|-----------------|
|                               | <i>Estimates</i> | <i>CI (95%)</i> | <i>Estimates</i> | <i>CI (95%)</i> |
| Intercept                     | -18.02           | -23.56 – -12.45 | -24.71           | -34.60 – -14.89 |
| partnerstatus:<br>Unpartnered | 3.89             | 1.24 – 6.48     | 5.57             | 2.14 – 8.89     |
| partnerstatus:<br>Repartnered | 0.33             | -2.28 – 3.07    | 0.20             | -3.39 – 3.76    |
| age                           | -0.04            | -0.19 – 0.10    | 0.16             | -0.07 – 0.39    |
| relig: Yes                    | -0.21            | -1.61 – 1.13    | -3.78            | -6.09 – -1.50   |
| child_age                     | 5.43             | 4.89 – 5.98     | 1.85             | 0.96 – 2.71     |
| kids_inhome                   | -1.02            | -1.91 – -0.10   | -0.75            | -2.05 – 0.54    |
| education2                    | 1.84             | 1.03 – 2.64     | 2.61             | 1.36 – 3.80     |
| nativity: Yes                 | -0.37            | -2.39 – 1.66    | 3.28             | -1.67 – 8.14    |
| ethnicityOtherormixed         | 2.40             | 0.22 – 4.62     | 2.34             | -0.19 – 4.85    |
| hhquintile                    | 3.14             | 2.39 – 3.90     | 2.86             | 1.77 – 3.96     |
| ressize2                      | 0.40             | -0.54 – 1.37    | 2.06             | 0.29 – 3.76     |
| Observations                  | 919              |                 | 606              |                 |
