# Supplementary material for: Mother’s Partnership Status and Allomothering Networks in the United Kingdom and United States
Source: MDPI journal article supplement (doi:10.3390/socsci10050182), 2021-05-20
Supplement: s1 [file s1]

# US Women's study

---

## Start of Block: Info Sheet

### Q308 **ASSOCIATIONS OF PARENTAL RELIGIOSITY WITH FAMILY SIZE, KIN SUPPORT, ALLOPARENTAL CARE, AND CHILD OUTCOMES IN THE UNITED STATES AND UNITED KINGDOM STUDY INTRODUCTION FOR PARTICIPANTS**

Thank you for showing an interest in this project. Please read this information carefully before deciding whether or not to participate. If you decide to participate we thank you. If you decide not to take part there will be no disadvantage to you and we thank you for considering our request.

**What is the aim of the project?** The aim of this study is to investigate how social networks, religious attitudes, and the availability of childcare interact to affect family size in Western societies. We will ask you some questions about your beliefs your household composition, your social and family contacts, your children, and the people who help you care for your children.

**What types of participants are being sought?** Women of all ages residing in the United States and the United Kingdom, and who have at least one child born since January 2016 are eligible to participate. Participation will consist of answering a questionnaire that should take about 10 minutes to complete. Participants will be compensated for their time at the rate suggested by Prolific: 1.25 GBP or equivalent in USD for approximately 10 minutes of participation. There are no other benefits for participation.

**What will participants be asked to do?** Should you agree to take part in this project, you will be asked to complete a questionnaire. This should take about 5-10 minutes. Upon completion of the questionnaire, you will be provided with a re-direct link back to Prolific to receive compensation. Please be aware that you may decide not to take part in the project without any disadvantage to yourself.

**What data or information will be collected and what use will be made of it?** Your responses to this questionnaire will be stored securely in such a manner that only the researchers listed below will be able to access them. No material that could personally identify you will be used in any reports or publications stemming from this study. Results of this research may be published and will be available in the [redacted for peer review]. Once the study is complete, the data will be publicly archived so that it may be used by other researchers. Every effort will be made to preserve your anonymity.

**Can participants change their mind and withdraw from the project?** You may exit the questionnaire at any point or withdraw from the project before its completion and without disadvantage to yourself. If you exit the questionnaire without completing it, your data will be deleted from the study.

**What if participants have any questions?** If you have any questions about our project, either now or in the future, please feel free to contact either:

[redacted for peer review]

This study has been approved by the Department stated above [reference number: xxx]. However, if you have any concerns about the ethical conduct of the research you may contact

[redacted for peer review]. Any issues you raise will be treated in confidence and investigated and you will be informed of the outcome. **Your completion of this questionnaire constitutes consent to participate. If you do not consent to participate, please exit the questionnaire now.**

End of Block: Info Sheet

---

Start of Block: Intro block

**Q2 The next few questions will ask for some information about yourself.**

---

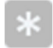

Q1 In what year were you born? Please use the format YYYY (for example: 1990).

---

---

Q334 In what month were you born?

- January (4)
  - February (5)
  - March (6)
  - April (7)
  - May (8)
  - June (9)
  - July (10)
  - August (11)
  - September (12)
  - October (13)
  - November (14)
  - December (15)
-

Q3 What is your ethnicity? Check all that apply

- White (1)
  - Black / African / Caribbean / African-American (2)
  - Hispanic or Latino/a (3)
  - American Indian / Alaska Native / Native Hawaiian or Pacific Islander (4)
  - Asian / Asian-American (5)
  - Mixed / Multiple ethnicities (7)
  - Other ethnicities (8)
- 

Q4 Were you born in the United States?

- Yes (1)
  - No (2)
- 

*Display This Question:*

*If Were you born in the United States? = No*

Q5 In which country were you born?

---

*Display This Question:*

*If Were you born in the United States? = No*

Q7 How long have you resided in the United States?

Years (1) \_\_\_\_\_

Months (2) \_\_\_\_\_

---

Q8 Which of the following do you live in?

Village (1)

Town (2)

City (3)

---

Q192 What is the highest level of education you have completed?

Primary (1)

Secondary school/ high school or equivalent (e.g. GED, GSCE, SQC) (2)

Junior college or equivalent (e.g. A-levels, Associate's degree) (5)

Undergraduate degree or equivalent (e.g. Bachelor's degree) (3)

Post-graduate degree or equivalent (e.g. Master's, MD, JD, PhD) (4)

---

Q316 Prior to the start of the COVID-19 pandemic, were you employed?

Yes (1)

No (2)

---

Q317 Prior to the start of the COVID-19 pandemic, were you attending courses at a school, college, university, or similar?

Yes (1)

No (2)

---

*Display This Question:*

*If Prior to the start of the COVID-19 pandemic, were you employed? = Yes*

Q195 Prior to the start of the COVID-19 pandemic, on average how many hours weekly did you dedicate to paid work?

---

---

*Display This Question:*

*If Prior to the start of the COVID-19 pandemic, were you attending courses at a school, college, uni... = Yes*

Q318 Prior to the start of the COVID-19 pandemic, on average how many hours weekly did you dedicate to your studies?

---

Q9 Approximately, what is the total annual income of your household?

- Less than \$15,000 (1)
  - \$15,000 - \$29,999 (3)
  - \$30,000 - \$44,999 (4)
  - \$45,000 - \$59,999 (5)
  - \$60,000 - \$74,999 (6)
  - \$75,000 - \$89,000 (11)
  - \$90,000 - \$ 104,999 (12)
  - \$105,000 - \$119,999 (13)
  - More than \$120,000 (7)
- 

Q191 How many people live in your household?

- Adults aged 18 and over (4)  
\_\_\_\_\_
  - Children under 18 years (5)  
\_\_\_\_\_
- 

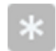

Q10 How many female siblings (sisters) do you have?

\_\_\_\_\_

---

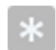

Q11 How many male siblings (brothers) do you have?

\_\_\_\_\_

---

Q313 How tall are you? Please answer in either feet and inches or centimeters.

- Feet (1) \_\_\_\_\_
  - Inches (2) \_\_\_\_\_
  - Centimeters (3) \_\_\_\_\_
- 

Q337 Which of the following would you say describes your physical health now?

- Fit and well (1)
  - Mostly well and healthy (2)
  - Often feel unwell (3)
  - Hardly ever feel well (4)
- 

Q338 Which of the following would you say describes your mental health now?

- Fit and well (1)
  - Mostly well and healthy (2)
  - Often feel unwell (3)
  - Hardly ever feel well (4)
-



Q12 Are you currently married or living with a long-term partner?

Yes (1)

No (2)

*Skip To: End of Block If Are you currently married or living with a long-term partner? = No*

---

Q13 How long has this relationship been ongoing? Please answer in years and months.

Years (1) \_\_\_\_\_

Months (2) \_\_\_\_\_

End of Block: Intro block

---

Start of Block: Religion block

**Q14 The next few questions will ask about your religious practices.**

---

Q15 What is your religious affiliation?

- Unaffiliated (10)
- Protestant (1)
- Catholic (2)
- Church of Latter-day Saints (3)
- Other Christian (4)
- Jewish (5)
- Muslim (6)
- Buddhist (7)
- Hindu (8)
- Other (12) \_\_\_\_\_

---

*Display This Question:*

*If Are you currently married or living with a long-term partner? = Yes*

Q16 What is your partner's religious affiliation?

- Unaffiliated (10)
  - Protestant (1)
  - Catholic (2)
  - Church of Latter-day Saints (3)
  - Other Christian (4)
  - Jewish (5)
  - Muslim (6)
  - Buddhist (7)
  - Hindu (8)
  - Other (11) \_\_\_\_\_
- 

Q17 Prior to the start of the COVID-19 pandemic, did you ever attend a house of worship?

- Yes (1)
  - No (2)
- 

*Display This Question:*

*If Prior to the start of the COVID-19 pandemic, did you ever attend a house of worship? = Yes*

Q18 Prior to the COVID-19 pandemic, how often did you attend services at this house of worship?

- More than once a week (4)
- Once a week (5)
- Once a month (6)
- Only on holidays (7)
- Once a year (8)

---

*Display This Question:*

*If Prior to the start of the COVID-19 pandemic, did you ever attend a house of worship? = Yes*

Q19 When you attended prior to the COVID-19 pandemic, on average how many people were present at a service at this house of worship?

- Less than 20 people (1)
- 20-49 people (2)
- 50-100 people (3)
- More than 100 people (4)

---

*Display This Question:*

*If Prior to the start of the COVID-19 pandemic, did you ever attend a house of worship? = Yes*

Q23 Since the onset of the COVID-19 pandemic, do you attend in-person services at your house of worship more often, less often, or about the same as before the start of the pandemic?

- More often (1)
- Less often (2)
- About the same (3)

Display This Question:

If Prior to the start of the COVID-19 pandemic, did you ever attend a house of worship? = Yes

Q25 Since the onset of the COVID-19 pandemic, do you attend services online more often, less often, or about the same than you attended in-person before the start of the pandemic?

- More often than in person services (1)
  - Less often than in person services (2)
  - About the same as in person services (3)
- 

Q20 Prior to the COVID-19 pandemic, on average, how often did you pray outside of services at a house of worship?

- Daily or almost daily (4)
  - Once a week (5)
  - Once a month (6)
  - Less than once a month (7)
- 

Q21 How important is your religion (or lack thereof) to you?

- Very important (1)
  - Somewhat important (2)
  - Not important (3)
- 

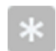

Q22 Prior to the onset of the COVID-19 pandemic, how many hours per week did you typically spend participating in activities related to your religious community outside of services at a house of worship?

These activities could include charity work, participating in schooling, or any events related to a religious group or house of worship.

---

Q26 Since the onset of the COVID-19 pandemic, do you pray outside of services more often, less often, or about the same as before the start of the pandemic?

- More often (1)
- Less often (2)
- About the same (3)

End of Block: Religion block

---

Start of Block: Reproductive history - Children prompt

Q27 **The next set of questions asks about your children.**

---

Q28 Are you currently pregnant?

- Yes (1)
- No (2)

**\***

Q29 How many children have you given birth to?

---

*Skip To: End of Survey If Condition: How many children have you ... Is Equal to 0. Skip To: End of Survey.*

---

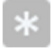

Q34 How many children under 18 currently live in your household? Include biological, adopted, step, foster children, and any other children you consider to be yours

---

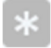

Q35 Of the children residing in your home, how many have you given birth to?

---

Q314 Do you intend to give birth to another child in the next two years?

Yes (1)

No (2)

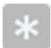

Q36 How many more children would you like to give birth to?

---

End of Block: Reproductive history - Children prompt

---

Start of Block: Reproductive history - Child info loop

**Q31 Please answer the following questions for each child you have given birth to.**

**Start with your oldest child. When you have completed these questions for your oldest child, please click the next button and repeat the questions for your next oldest child.**

Currently answering about child `#{Im://CurrentLoopNumber}` out of `#{Im://TotalLoops}`.

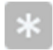

Q32 In what year was your [\\${Im://Field/2}](#) child born? Please use the format YYYY (for example: 2019).

---

---

Q335 In what month was your [\\${Im://Field/2}](#) child born?

- January (1)
  - February (2)
  - March (3)
  - April (4)
  - May (5)
  - June (6)
  - July (7)
  - August (8)
  - September (9)
  - October (10)
  - November (11)
  - December (12)
-



Q33 What is the gender of your  $\{\text{Im://Field/2}\}$  child?

- Male (1)
  - Female (2)
  - Non-binary or other (3)
- 

Q37 Does this child currently live in your household?

- Yes (1)
  - No (2)
- 

*Display This Question:*

*If Are you currently married or living with a long-term partner? = Yes*

Q197 Is your current partner the biological parent of this child?

- Yes (1)
- No (2)

End of Block: Reproductive history - Child info loop

---

Start of Block: Kin proximity

Q39 We will now ask you some questions about your family and how far away they reside from you

---

Q40 Do any of these individuals reside in your household? Please select all that apply.

- Your mother (1)
  - Your father (2)
  - Your partner's mother (3)
  - Your partner's father (4)
  - Other adult relative (6)
  - Other adult non-relative (7)
  - None of the above (5)
- 

Q41 Consider your relatives. Do any of these individuals live within one hour's travel time from your place of residence? Please select all that apply.

- Your mother (1)
  - Your father (2)
  - At least one of your sisters (3)
  - At least one of your brothers (4)
  - Any other female relative (5)
  - Any other male relative (6)
  - None of the above (7)
- 

*Display This Question:*

*If Are you currently married or living with a long-term partner? = Yes*

Q42 Consider your partner's relatives. Do any of these individuals live within one hour's travel time from your place of residence? Please select all that apply.

- Your partner's mother (1)
- Your partner's father (2)
- At least one of your partner's sisters (3)
- At least one of your partner's brothers (4)
- Any other of your partner's female relatives (5)
- Any other of your partner's male relatives (6)
- None of the above (7)

End of Block: Kin proximity

---

Start of Block: Social network prompt

**Q63 Please consider up to five women whom you are close to and who you can talk to about important personal matters, for example your children, family, health, or other things.**

**These women can be your relatives or from outside of your family, but should not live in your household. They can be located in your current place of residence or anywhere else.**

**We will ask you a few questions about your relationship with each woman. You can identify between zero and five women.**

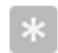

Q64 How many women are you close to, as defined above? Please enter a number from 0 to 5.

\_\_\_\_\_

End of Block: Social network prompt

---

Start of Block: Social network details

**Q75 For each woman in turn, please answer the following questions. When you are done answering about one woman, click the next arrow and you will be brought back to this page to answer questions about the next woman.**

You are currently answering about woman  $\${m://CurrentLoopNumber}$  out of  $\${m://TotalLoops}$ .

---

Q65 What is this person's relationship to you?

- Relative (1)
  - Friend (2)
  - Colleague (3)
  - Neighbour (4)
  - Other (5) \_\_\_\_\_
- 

*Display This Question:*

*If Loop current: What is this person's relationship to you? = Relative*

Q76 Which relative is this?

- Your mother (1)
  - Your partner's mother (2)
  - Sister (3)
  - Your partner's sister (7)
  - Aunt (5)
  - Your partner's aunt (8)
  - Cousin (4)
  - Your partner's cousin (9)
  - Other (6) \_\_\_\_\_
- 

Q66 Prior to the start of the COVID-19 pandemic, how often did you see each other?

- Every day or nearly every day (1)
  - Once a week (2)
  - A few times a month (3)
  - Once a month (4)
  - A few times a year (5)
  - Once a year or less (6)
-

Q201 Since the start of the COVID-19 pandemic, do you see each other more often, less often, or about the same as before the pandemic?

- More often (1)
  - Less often (2)
  - About the same (3)
- 

Q68 Prior to the start of the COVID-19 pandemic, how often did you contact each other by phone, mail, e-mail or similar?

- Every day or nearly every day (1)
  - Once a week (2)
  - A few times a month (3)
  - Once a month (4)
  - A few times a year (5)
  - Once a year or less (6)
- 

Q202 Since the start of the COVID-19 pandemic, do you contact each other by phone, email, or e-mail more often, less often, or about the same as before the pandemic?

- More often (1)
  - Less often (2)
  - About the same (3)
-

Q69 Does this person live within one hour's travel time from your residence?

Yes (1)

No (2)

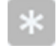

Q70 How many children does this person have?

\_\_\_\_\_

Q71 Does this person share the same religious affiliation (or lack thereof) as you?

Yes (1)

No (2)

I do not know (3)

---

*Display This Question:*

*If Prior to the start of the COVID-19 pandemic, did you ever attend a house of worship? = Yes*

Q72 Does this person attend the same house of worship as you?

Yes (1)

No (2)

End of Block: Social network details

---

Start of Block: Focus child details

Q44 **We will now ask you to answer more detailed questions about one of your children.**

**Please think of your oldest child under the age of 5 years, and answer the following questions**

---

Q45 In what year was the child matching the description above born? Please use the format YYYY (for example: 2019).

\_\_\_\_\_

---

Q46 How many weeks did the pregnancy last before you gave birth?

Weeks (1) \_\_\_\_\_

---

Q47 What was the child's birth weight? You can answer either in pounds and ounces or in kilograms

Pounds (1) \_\_\_\_\_

Ounces (2) \_\_\_\_\_

Kilograms (3) \_\_\_\_\_

---

Q200 Did you breastfeed this child?

No, I did not breastfeed this child (4)

Yes, and I am currently breastfeeding this child (5)

Yes, and I have stopped breastfeeding this child (7)

---

*Display This Question:*

*If Did you breastfeed this child? = Yes, and I have stopped breastfeeding this child*

Q312 How long did you breastfeed the child?



Please answer in years and months. For example, enter six months of breastfeeding as 0 Years and 6 Months.

Years (1) \_\_\_\_\_

Months (2) \_\_\_\_\_

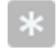

Q48 Since the beginning of the year, how many times has this child been ill with diarrhea?

\_\_\_\_\_

Q49 Since the beginning of the year, how many times has this child been ill with a fever?

\_\_\_\_\_

Q50 Since the beginning of the year, how many times has this child been ill with a cough?

\_\_\_\_\_

Q339 How would you assess the health of this child?

Very healthy, no problems (1)

Healthy, but a few minor problems (2)

Sometimes quite ill (3)

Almost always unwell (4)

---

Q340 How would you assess the development of this child relative to other children of his or her age?

- Advanced relative to his/her peers (1)
  - On par with his/her peers (2)
  - Delayed relative to his/her peers (3)
- 

Q198 Prior to the start of the COVID-19 pandemic, how many hours per week did the child spend in childcare that was either paid by yourself or state-provided? Examples of paid or state-provided childcare include babysitters, nannies, or daycares.

- Hours per week (1) \_\_\_\_\_

End of Block: Focus child details

---

Start of Block: Allocare prompt

Q61

**We will now ask you questions about who provides care for this child besides yourself. We will ask you to give basic information for each person and tell us what they helped you with.**

**Please include all relatives, including your partner and your older children, and all friends, acquaintances and neighbours. Please do not include paid or state-provided help such as babysitters, nannies, and daycares.**

**Please keep thinking of your oldest child under the age of 5 years for this series of questions. Recall a typical month prior to the start of the COVID-19 pandemic, for example the month of February.**

The forms of care we are interested in are: 1. Washing or changing the child

3. Feeding the child

4. Playing with the child

5. Supervising the child either actively or passively

6. Taking the child for a walk

7. Taking care of the child when sick

---



Q62 Thinking back to a typical month before the start of the COVID-19 pandemic, how many people helped you with the tasks described above? Please enter a number from 0 to 10.

---

End of Block: Allocare prompt

---

Start of Block: Allocare details loop

**Q204 For each person who provides care for the child besides yourself, please answer the following questions. When you are done with one person, you will be brought back to this page to answer questions about the next person.**

You are currently answering about the  $\${m://Field/2}$  person out of  $\${m://TotalLoops}$ .

---

Q207 What is the gender of this person who helped you?

- Male (1)
  - Female (2)
  - Non-binary or other (3)
- 

Q208 Is this person your partner, one of your relatives, or one of your partner's relatives?

- Yes (1)
  - No (2)
- 

*Display This Question:*

*If Loop current: Is this person your partner, one of your relatives, or one of your partner's relatives? = Yes*

*And Loop current: What is the gender of this person who helped you? = Male*

Q209 Which relative is this?

- Your partner (who is biological father of the child) (10)
- Your partner (who is not the biological father of the child) (17)
- The father of the child (who is no longer your partner) (18)
- Your child (13)
- Your father (11)
- Your partner's father (12)
- Your uncle (15)
- Your partner's uncle (16)
- Your cousin (4)
- Your partner's cousin (9)
- Other (6) \_\_\_\_\_

---

*Display This Question:*

*If Loop current: Is this person your partner, one of your relatives, or one of your partner's relatives? = Yes*

*And Loop current: What is the gender of this person who helped you? = Female*

Q210 Which relative is this?

- Your partner (10)
- Your older child (13)
- Your mother (1)
- Your partner's mother (2)
- Your sister (3)
- Your partner's sister (7)
- Your aunt (5)
- Your partner's aunt (8)
- Your cousin (4)
- Your partner's cousin (9)
- Other (6) \_\_\_\_\_

---

*Display This Question:*

*If Loop current: Is this person your partner, one of your relatives, or one of your partner's relatives? = Yes*

*And Loop current: What is the gender of this person who helped you? = Non-binary or other*

Q297 Which relative is this? Include whether this is your relative or your partner's relative if applicable

\_\_\_\_\_

---

Q211 Does this person live in your household?

- Yes (1)
- No (2)

---

Q212 Does this person share the same religious affiliation (or lack thereof) as you?

- Yes (1)
- No (2)
- I do not know (3)

---

*Display This Question:*

*If Prior to the start of the COVID-19 pandemic, did you ever attend a house of worship? = Yes*

Q213 Does this person attend the same house of worship as you?

- Yes (1)
  - No (2)
-

Q214 For each of the following types of help, please indicate how often this person provides this help for you and your child

|                                                         | Daily (1)             | Weekly (2)            | Monthly (3)           | Less than monthly (5) | Never (7)             |
|---------------------------------------------------------|-----------------------|-----------------------|-----------------------|-----------------------|-----------------------|
| Changing or washing the child (9)                       | <input type="radio"/> |
| Feeding the child (2)                                   | <input type="radio"/> |
| Playing with the child (3)                              | <input type="radio"/> |
| Supervising the child whether actively or passively (4) | <input type="radio"/> |
| Taking the child for a walk (6)                         | <input type="radio"/> |
| Taking care of the child when sick (5)                  | <input type="radio"/> |
| Other childcare tasks (7)                               | <input type="radio"/> |

Q298 Since the onset of the COVID-19 pandemic, does this person provide these types of childcare help more often, less often, or about the same as before the start of the pandemic?

- More often (1)
- Less often (2)
- About the same (3)

End of Block: Allocare details loop

Start of Block: Household help prompt

Q319

**We will now ask you questions about who provides help with household tasks. We will ask you to give basic information for each person and tell us what they helped you with.**

**Please include all relatives, including your partner and your older children, and all friends, acquaintances and neighbours. Please do not include paid or state-provided help such as cleaners or care aides.**

**Recall a typical month prior to the start of the COVID-19 pandemic, for example the month of February.**

The forms of help we are interested in are: 1. Grocery shopping  
2. Cleaning the home  
3. Preparing meals  
4. Washing clothing  
5. Running errands

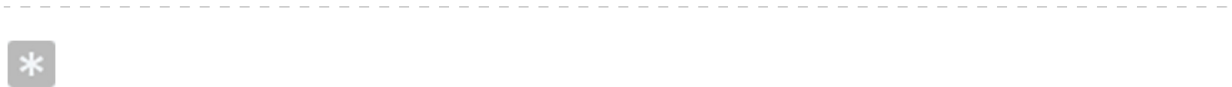

Q320 Thinking back to a typical month before the start of the COVID-19 pandemic, how many people helped you with the tasks described above? Please enter a number from 0 to 10.

---

End of Block: Household help prompt

---

Start of Block: Household help details loop

**Q321 For each person who provides your household with help, please answer the following questions. When you are done with one person, you will be brought back to this page to answer questions about the next person.**

You are currently answering about the  $\${Im://Field/2}$  person out of  $\${Im://TotalLoops}$ .

---



Q322 What is the gender of this person who helped you?

- Male (1)
  - Female (2)
  - Non-binary or other (3)
- 

Q323 Is this person your partner, one of your relatives, or one of your partner's relatives?

- Yes (1)
  - No (2)
- 

*Display This Question:*

*If Loop current: Is this person your partner, one of your relatives, or one of your partner's relatives? = Yes*

*And Loop current: What is the gender of this person who helped you? = Male*

Q324 Which relative is this?

- Your partner (who is biological father of the child) (10)
- Your partner (who is not the biological father of the child) (17)
- The father of the child (who is no longer your partner) (18)
- Your child (13)
- Your father (11)
- Your partner's father (12)
- Your uncle (15)
- Your partner's uncle (16)
- Your cousin (4)
- Your partner's cousin (9)
- Other (6) \_\_\_\_\_

---

*Display This Question:*

*If Loop current: Is this person your partner, one of your relatives, or one of your partner's relatives? = Yes*

*And Loop current: What is the gender of this person who helped you? = Female*

Q325 Which relative is this?

- Your partner (10)
- Your older child (13)
- Your mother (1)
- Your partner's mother (2)
- Your sister (3)
- Your partner's sister (7)
- Your aunt (5)
- Your partner's aunt (8)
- Your cousin (4)
- Your partner's cousin (9)
- Other (6) \_\_\_\_\_

---

*Display This Question:*

*If Loop current: What is the gender of this person who helped you? = Non-binary or other*

*And Loop current: Is this person your partner, one of your relatives, or one of your partner's relatives? = Yes*

Q326 Which relative is this? Include whether this is your relative or your partner's relative if applicable

\_\_\_\_\_

---

Q327 Does this person live in your household?

- Yes (1)
- No (2)

---

Q328 Does this person share the same religious affiliation (or lack thereof) as you?

- Yes (1)
- No (2)
- I do not know (3)

---

*Display This Question:*

*If Prior to the start of the COVID-19 pandemic, did you ever attend a house of worship? = Yes*

Q329 Does this person attend the same house of worship as you?

- Yes (1)
  - No (2)
-

Q332 For each of the types of help, please indicate how often this person provides this help for you and your household

|                           | Daily (1)             | Weekly (2)            | Monthly (3)           | Less than monthly (4) | Never (5)             |
|---------------------------|-----------------------|-----------------------|-----------------------|-----------------------|-----------------------|
| Grocery shopping (1)      | <input type="radio"/> |
| Cleaning the home (2)     | <input type="radio"/> |
| Preparing meals (3)       | <input type="radio"/> |
| Washing clothes (4)       | <input type="radio"/> |
| Running errands (5)       | <input type="radio"/> |
| Other household tasks (6) | <input type="radio"/> |

Q333 Since the onset of the COVID-19 pandemic, does this person provide these other types of household help more often, less often, or about the same as before the onset of the pandemic?

- More often (1)
- Less often (2)
- About the same (3)

End of Block: Household help details loop

Start of Block: COVID and Childcare/Household Help

Q199

**We will now ask you questions about how the COVID-19 pandemic has affected your need for and receipt of help with childcare and household tasks.**

Q336 Compare your current situation to your situation prior to the onset of the COVID-19 pandemic.

Since the onset of the pandemic, do you now:

|                                                             | More (1)              | Less (2)              | About the same (3)    |
|-------------------------------------------------------------|-----------------------|-----------------------|-----------------------|
| Perform paid work (1)                                       | <input type="radio"/> | <input type="radio"/> | <input type="radio"/> |
| Need help with childcare (2)                                | <input type="radio"/> | <input type="radio"/> | <input type="radio"/> |
| Need help with household tasks (3)                          | <input type="radio"/> | <input type="radio"/> | <input type="radio"/> |
| Receive help with childcare (4)                             | <input type="radio"/> | <input type="radio"/> | <input type="radio"/> |
| Receive help with household tasks (5)                       | <input type="radio"/> | <input type="radio"/> | <input type="radio"/> |
| Rely on paid or state-provided help for childcare (6)       | <input type="radio"/> | <input type="radio"/> | <input type="radio"/> |
| Rely on paid or state-provided help for household tasks (7) | <input type="radio"/> | <input type="radio"/> | <input type="radio"/> |

---

Q304 Since the onset of the COVID-19 pandemic, do you now receive help with childcare from more, less, or about the same number of people?

- Receive help from more people (1)
  - Receive help from less people (2)
  - Receive help from about the same number of people (3)
-

Q307 Since the onset of the COVID-19 pandemic, do you now receive help with help with household tasks such as cleaning, shopping or preparing meals from more, less, or about the same number of people?

- Receive help from more people (1)
- Receive help from less people (2)
- Receive help from about the same number of people (3)

End of Block: COVID and Childcare/Household Help

---

Start of Block: Exit block

Q310 Thank you for completing this survey. To redirect back to Prolific, please click the following link: [\[Link\]](#) If you have any questions about our project, either now or in the future, please feel free to contact either: Laure Spake and John H. Shaver Religion Programme e-mail: [laure.spake@otago.ac.nz](mailto:laure.spake@otago.ac.nz) e-mail: [john.shaver@otago.ac.nz](mailto:john.shaver@otago.ac.nz) This study has been approved by the Department stated above [reference number: xxxx]. However, if you have any concerns about the ethical conduct of the research you may contact the University of Otago Human Ethics Committee through the Human Ethics Committee Administrator (ph +643 479 8256 or email [gary.witte@otago.ac.nz](mailto:gary.witte@otago.ac.nz)). Any issues you raise will be treated in confidence and investigated and you will be informed of the outcome.

End of Block: Exit block

---
